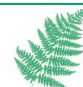

# Phylogenetic analysis of eastern Asian and eastern North American disjunct *Lespedeza* (Fabaceae) inferred from nuclear ribosomal ITS and plastid region sequences

JEONG EUN HAN<sup>1,2</sup>, KOOK-HYUN CHUNG<sup>1,3</sup>, TOMOYUKI NEMOTO<sup>4</sup> and BYOUNG-HEE CHOI<sup>1\*</sup>

<sup>1</sup>Department of Biological Sciences, Inha University, Incheon 402-751, Korea

<sup>2</sup>Vascular Plants Research Division, National Institute of Biological Resources, Incheon 404-708, Korea

<sup>3</sup>Department of Plant Biology, University of California, Davis, CA 95616, USA

<sup>4</sup>Department of Basic Sciences, Faculty of Science and Engineering, Ishinomaki Senshu University, Ishinomaki, Miyagi 986-8580, Japan

Received 9 February 2010; accepted for publication 27 August 2010

*Lespedeza* (tribe Desmodieae, Fabaceae) follows a disjunct distribution in eastern Asia and eastern North America. Phylogenetic relationships among its species and related taxa were inferred from nuclear ribosomal internal transcribed spacer (ITS) and plastid sequences (*trnH-psbA*, *psbK-psbI*, *trnK-matK* and *rpoC1*). We examined 35 species of *Lespedeza*, two of *Kummerowia* and one of *Campylotropis*, the sole constituents of the *Lespedeza* group. An analysis of these data revealed that the genus *Campylotropis* is sister to the other two genera. However, we were unable to resolve the relationships between *Kummerowia* and *Lespedeza* in the strict consensus trees of parsimony analyses based on plastid and combined DNA data. In the genus *Lespedeza*, the Old World subgenus *Macrolespedeza* is monophyletic, whereas the transcontinental subgenus *Lespedeza* is paraphyletic. Monophyly of eastern Asian species and of North American species is strongly supported. Although inconsistent with the traditional classification, this phylogenetic finding is consistent with seedling morphology. Three subgroups recognized in subgenus *Macrolespedeza* were unresolved in our phylogenetic trees. An incongruence length difference (ILD) test indicated that the two partitions (nuclear ITS and plastid sequences) were significantly incongruent, perhaps because of hybridization between species in *Lespedeza*. Most of the primary clades of tribe Desmodieae are Asian, implying that the relatively few New World ones, such as those in *Lespedeza*, are more recently derived from Asia. © 2010 The Linnean Society of London, Botanical Journal of the Linnean Society, 2010, **164**, 221–235.

**ADDITIONAL KEYWORDS:** disjunct distribution – internal transcribed spacer (ITS) – phylogeny – plastid sequences.

## INTRODUCTION

The genus *Lespedeza* Michaux is included in subtribe Lespedezinae Michx., tribe Desmodieae Benth. & Hook.f., of Fabaceae (Ohashi, Polhill & Schubert, 1981). The subtribe is characterized by one-seeded fruits compared with other members of the tribe,

which have jointed fruits and multiple seeds or loments. Based mainly on molecular data, the subtribe has been called ‘the *Lespedeza* group’ (Ohashi, 2005) and was recently described as comprising only three genera: *Lespedeza*, *Campylotropis* Bunge and *Kummerowia* Schindl. The first two are distinguished from each other by the following characteristics: keel petals straight and blunt vs. falcate and acute; primary bracts on the inflorescence axis subtending two

\*Corresponding author. E-mail: bhchoi@inha.ac.kr

flowers, i.e. 'pseudoraceme' (Lackey, 1981; Tucker, 1987) vs. one flower (simple raceme); and bracteoles persistent vs. deciduous. In contrast, *Kummerowia* differs from those two genera as follows: lateral veins extending to the margin vs. looped within the margin; annual herbs vs. perennial shrubs or herbs; and flowers and fruits subtended by several bract-like structures vs. not (Ohashi *et al.*, 1981). The intergeneric relationship among these three genera has been debated (Table 1). Akiyama & Ohba (1985) suggested, based on inflorescence morphology, that *Lespedeza* is more similar to *Campylotropis* than to *Kummerowia*. However, a closer relationship between *Lespedeza* and *Kummerowia* has been suggested based on floral structure (Nemoto & Ohashi, 1988) and inflorescence morphology (Nemoto & Ohashi, 1990, 1993a). Moreover, Nemoto, Ohashi & Tamate (1995) confirmed this relationship using restriction fragment length polymorphism (RFLP) of plastid DNA. In addition, Nemoto & Ohashi (1996) regarded the characteristic racemose inflorescence of *Campylotropis* as an extremely reduced form of the pseudoracemes of *Lespedeza* and *Kummerowia*. Although that is based on organographic and developmental observations, *Campylotropis* is distinguished from the latter by its inflorescence.

*Lespedeza* comprises approximately 40 species, of which 30 are found in eastern Asia, with the remainder occurring in eastern North America (Ohashi *et al.*, 1981). Historically, Maximowicz (1873) recognized two sections in subgenus *Lespedeza* (the present genus *Lespedeza*) (Table 1): (1) section *Macrolespedeza* Maxim., containing only Asian species which produce only flowers with corollas (chasmogamous); and (2) section *Eulespedeza* Maxim. [= section *Lespedeza*], comprising both American and Asian species that bear flowers with and without corollas (cleistogamous). Schindler (1913) and Nakai (1927) followed this traditional treatment and Nakai (1939) introduced a new section, *Heterolespedeza* Nakai, based on bud phyllotaxy, that contained two species, *Lespedeza buergeri* Miq. and *Lespedeza maximowiczii* C.K.Schneid. Ohashi (1982a) later divided *Lespedeza* into two subgenera, *Lespedeza* and *Macrolespedeza*, with section *Heterolespedeza* within subgenus *Macrolespedeza*. Akiyama (1988) further divided section *Macrolespedeza* into three series [*Macrolespedeza* Maxim., *Formosae* S.Akiyama & H.Ohba and *Heterolespedeza* (Nakai) S.Akiyama & H.Ohba]. *Heterolespedeza* is distinguished from *Macrolespedeza* by its distichously arranged winter bud scales that are arranged spirally. *Macrolespedeza* differs from *Formosae* in having standard petals with an attenuated base, whereas the latter has petals with a clawed base.

The genus *Lespedeza* exhibits a well-known disjunct distribution between eastern Asia and eastern North

America. Maximowicz (1873) recognized four groups as series (*Violaceae* Maxim., *Junceae* Maxim., *Lespedezariae* (Torr. & A. Gray) Maxim. and *Pilosa* Maxim.) in his section *Lespedeza* (the present subgenus *Lespedeza*) (Table 1) and grouped disjunct Asian and North American species within series *Violaceae* and *Lespedezariae*. In contrast, Schindler (1913) recognized three lineages in subgenus *Lespedeza*. One comprised 14 Asian species, the second, only North American species and, the third, three North American and one Asian species (*L. tomentosa* (Thunb.) Siebold ex Maxim.). Nemoto & Ohashi (1993b) suggested a monophyletic origin for North American species from an Asian ancestor based on seedling morphology. All Asian species, in both subgenera *Macrolespedeza* and *Lespedeza*, develop two opposite unifoliate eophylls subsequent to cotyledons, followed by alternate trifoliate metaphylls, whereas the North American species have only one unifoliate eophyll between cotyledons and alternate trifoliate metaphylls. Floristic relationships and similarity between eastern Asian and eastern North American species have been reviewed several times (Li, 1952; Tiffney, 1985; Boufford, 1998; Wen, 1998, 1999) and most of those disjunct genera have been considered monophyletic (Wen, 2001). Despite the long-standing interest, phylogenetic relationships among taxa displaying the disjunction have remained obscure (Xiang, Soltis & Soltis, 1998) and these taxa are still not well studied, perhaps because of their wide geographical range (Wen, 1999).

Our main foci here were: (1) phylogenetic relationships among the species of *Lespedeza* and related taxa and (2) phytogeographical implications in relation to the disjunct distribution between eastern Asia and eastern North America that arise from analyses of nuclear ribosomal and plastid DNA data.

## MATERIAL AND METHODS

### TAXON SAMPLING

In this study, we sampled 35 species of the genus *Lespedeza*, 25 from east Asia and 10 from eastern North America (Table 2). To investigate other relationships, we also examined both species of *Kummerowia* and one of the 37 species of *Campylotropis*. To assess the disjunct distribution between those two continents, we sampled 13 species of subgenus *Macrolespedeza* and 22 species of subgenus *Lespedeza*, 12 from east Asia and 10 from North America. Two species from *Hylodesmum* H.Ohashi & R.R.Mill were included as an outgroup, because members of that genus (previously included in *Desmodium* Desv.) are sister to the *Lespedeza* group, as inferred from molecular phylogenetic research of plastid sequences for almost all legumes (Kajita *et al.*, 2001) or phaseo-

**Table 1.** Previous taxonomic treatments of *Lespedeza* and related taxa

| Maximowicz (1873)                                                                                                                                          | Schindler (1913)                                                          | Nakai (1927, 1939*)                                                               | Ohashi (1982a),<br>Ohashi <i>et al.</i> (2009a & b)                                                                     | Akiyama (1988)                                                                                                                                                                                                                                              |
|------------------------------------------------------------------------------------------------------------------------------------------------------------|---------------------------------------------------------------------------|-----------------------------------------------------------------------------------|-------------------------------------------------------------------------------------------------------------------------|-------------------------------------------------------------------------------------------------------------------------------------------------------------------------------------------------------------------------------------------------------------|
| Genus <i>Lespedeza</i> Michaux<br>Subgenus <i>Campylotropis</i><br>(Bunge) Maxim.                                                                          | Genus <i>Campylotropis</i> Bunge                                          | Genus <i>Lespedeza</i> Michaux<br>Section <i>Campylotropis</i><br>(Bunge) Bentham |                                                                                                                         |                                                                                                                                                                                                                                                             |
| Subgenus <i>Lespedeza</i><br>Section <i>Macrolespedeza</i><br>Maxim.                                                                                       | Genus <i>Lespedeza</i> Michaux<br>Section <i>Macrolespedeza</i><br>Maxim. | Section <i>Macrolespedeza</i><br>Maxim.                                           | Genus <i>Lespedeza</i> Michaux<br>Subgenus <i>Macrolespedeza</i><br>(Maxim.) H. Ohashi<br>Section <i>Macrolespedeza</i> | Genus <i>Lespedeza</i> Michaux<br>Section <i>Macrolespedeza</i><br>Maxim.<br>Series <i>Macrolespedeza</i><br>Series <i>Formosae</i><br>S. Akiyama & H. Ohba<br>Series <i>Heterolespedeza</i><br>(Nakai) S. Akiyama &<br>H. Ohba<br>Section <i>Lespedeza</i> |
| Section <i>Eulespedeza</i><br>Series <i>Violaceae</i> Maxim.<br>Series <i>Junceae</i> Maxim.<br>Series <i>Lespedezariae</i><br>(Torr. & A. Gray)<br>Maxim. | Section <i>Eulespedeza</i>                                                | Section <i>Heterolespedeza</i><br>Nakai*                                          | Section <i>Heterolespedeza</i><br>Nakai                                                                                 |                                                                                                                                                                                                                                                             |
| Series <i>Pilosa</i> Maxim.<br>Subgenus <i>Microlespedeza</i><br>Maxim.                                                                                    | Genus <i>Kummerowia</i> Schindl                                           | Section <i>Eulespedeza</i>                                                        | Subgenus <i>Lespedeza</i>                                                                                               |                                                                                                                                                                                                                                                             |

**Table 2.** Voucher specimens and GenBank accession numbers of the materials examined for nuclear ribosomal internal transcribed spacer (ITS) and plastid sequences

| Taxon                                                                              | Voucher                                       | ITS      | <i>trnK-matK</i> | <i>psbK-psbI</i> | <i>trnH-psbA</i> | <i>rpoC1</i> |
|------------------------------------------------------------------------------------|-----------------------------------------------|----------|------------------|------------------|------------------|--------------|
| <i>Lespedeza angustifolia</i> (Pursh) Elliott                                      | USA; H. Ohashi <i>et al.</i> 61079 (TUS)      | GU572169 | GU572328         |                  | GU572289         | GU572249     |
|                                                                                    | USA; A.F. Clewell & R.K. Godfrey 2067 (TUS)   |          |                  | GU572209         |                  |              |
| <i>L. bicolor</i> Turcz.                                                           | Korea; C.Y. Yoon <i>s.n.</i> (IUI)            | GU572170 | GU572329         | GU572210         | GU572290         | GU572250     |
| <i>L. buergeri</i> Miq.                                                            | Japan; B.H. Choi <i>et al.</i> 9811 (IUI)     | GU572171 | GU572330         | GU572211         | GU572291         | GU572251     |
| <i>L. capitata</i> Michx.                                                          | USA; K.H. Chung 479 (IUI)                     | GU572172 | GU572331         | GU572212         | GU572292         | GU572252     |
| <i>L. caraganae</i> Bunge                                                          | China; H. Ohashi & T. Nemoto 62004 (TUS)      | GU572173 | GU572332         | GU572213         | GU572293         | GU572253     |
| <i>L. chinensis</i> G.Don                                                          | Taiwan; T. Nemoto 2392 (TUS)                  | GU572174 | GU572333         | GU572214         | GU572294         | GU572254     |
| <i>L. cuneata</i> (Dumon de Courset) G.Don                                         | Korea; J.E. Han 092 (IUI)                     | GU572175 | GU572334         | GU572215         | GU572295         | GU572255     |
| <i>L. cyrtobotrya</i> Miq.                                                         | Korea; B.H. Choi <i>et al.</i> 9813 (IUI)     | GU572176 | GU572335         | GU572216         | GU572296         | GU572256     |
| <i>L. davidii</i> Franch.                                                          | Korea; J.S. Han <i>s.n.</i> (IUI)             | GU572178 | GU572337         | GU572218         | GU572298         | GU572258     |
| <i>L. daurica</i> (Laxm.) Schindl.                                                 | Korea; J.E. Han 105 (IUI)                     | GU572177 | GU572336         | GU572217         | GU572297         | GU572257     |
| <i>L. floribunda</i> Bunge                                                         | Korea; J.E. Han 618 (IUI)                     | GU572179 | GU572338         | GU572219         | GU572299         | GU572259     |
| <i>L. formosa</i> (Vogel) Koehne subsp. <i>velutina</i> (Nakai) S.Akiyama & H.Ohba | Korea; B.H. Choi <i>et al.</i> 9814 (IUI)     | GU572180 | GU572339         | GU572220         | GU572300         | GU572260     |
| <i>L. forrestii</i> Schindl.                                                       | China; T. Nemoto <i>et al.</i> 96803001 (TUS) | GU572181 | GU572340         | GU572221         | GU572301         | GU572261     |
| <i>L. hirta</i> (L.) Hornem.                                                       | USA; T. Nemoto & J. Yokoyama 95817001 (TUS)   | GU572182 | GU572341         | GU572222         | GU572302         | GU572262     |
| <i>L. homoloba</i> Nakai                                                           | Japan; B.H. Choi <i>et al.</i> 9815 (IUI)     | GU572183 | GU572342         | GU572223         | GU572303         | GU572263     |
| <i>L. inschanica</i> (Maxim.) Schindl.                                             | Korea; J.E. Han 311 (IUI)                     | GU572184 | GU572343         | GU572224         | GU572304         | GU572264     |
| <i>L. intermedia</i> (S.Watson) Britton                                            | USA; B.H. Choi 9816 (IUI)                     | GU572185 | GU572344         | GU572225         | GU572305         | GU572265     |
| <i>L. japonica</i> L.H.Bailey                                                      | Japan; B.H. Choi <i>et al.</i> 9817 (IUI)     | GU572186 | GU572345         | GU572226         | GU572306         | GU572266     |
| <i>L. juncea</i> (L.f.) Pers.                                                      | Korea; J.E. Han 093 (IUI)                     | GU572187 | GU572346         | GU572227         | GU572307         | GU572267     |
| <i>L. lichiyuniae</i> T.Nemoto, H.Ohahi & T.Itoh                                   | Korea; J.E. Han 199 (IUI)                     | GU572189 | GU572348         | GU572229         | GU572309         | GU572269     |
| <i>L. leptostachya</i> Engelm.                                                     | USA; P. Frana & M. J. Leoschke 37 (ISC)       | GU572188 | GU572347         | GU572228         | GU572308         | GU572268     |
| <i>L. maritima</i> Nakai                                                           | Korea; B.H. Choi <i>et al.</i> 9707 (IUI)     | GU572190 | GU572349         | GU572230         | GU572310         | GU572270     |

Table 2. Continued

| Taxon                                                         | Voucher                                           | ITS      | <i>trnK-matK</i> | <i>psbK-psbI</i> | <i>trnH-psbA</i> | <i>rpoC1</i> |
|---------------------------------------------------------------|---------------------------------------------------|----------|------------------|------------------|------------------|--------------|
| <i>L. maximowiczii</i><br>C.K.Schneid.                        | Korea; J.E. Han 547<br>(IUI)                      | GU572191 | GU572350         | GU572231         | GU572311         | GU572271     |
| <i>L. melanantha</i> Nakai                                    | Korea; K.H. Chung<br>336 (IUI)                    | GU572192 | GU572351         | GU572232         | GU572312         | GU572272     |
| <i>L. nipponica</i> Nakai                                     | Japan; B.H. Choi <i>et al.</i><br>9820 (IUI)      | GU572193 | GU572352         | GU572233         | GU572313         | GU572273     |
| <i>L. patens</i> Nakai                                        | Japan; B.H. Choi <i>et al.</i><br>9821 (IUI)      | GU572194 | GU572353         | GU572234         | GU572314         | GU572274     |
| <i>L. pilosa</i> (Thunb.)<br>Siebold & Zucc.                  | Korea; J.E. Han 318<br>(IUI)                      | GU572195 | GU572354         | GU572235         | GU572315         | GU572275     |
| <i>L. procumbens</i> Michx.                                   | USA; H. Ohashi <i>et al.</i><br>60412 (TUS)       | GU572196 | GU572355         | GU572236         | GU572316         | GU572276     |
| <i>L. repens</i> (L.) Barton                                  | USA; T. Nemoto & J.<br>Yokoyama 95816027<br>(TUS) | GU572197 | GU572356         | GU572237         | GU572317         | GU572277     |
| <i>L. stuevei</i> Nutt.                                       | USA; H. Ohashi <i>et al.</i><br>61092 (TUS)       | GU572198 | GU572357         | GU572238         |                  | GU572278     |
| <i>L. thunbergii</i> (DC.)<br>Nakai                           | Japan; B.H. Choi <i>et al.</i><br>9823 (IUI)      | GU572199 | GU572358         | GU572239         | GU572318         | GU572279     |
| <i>L. tomentosa</i> (Thunb.)<br>Siebold ex Maxim.             | Korea; J.E. Han 240<br>(IUI)                      | GU572200 | GU572359         | GU572240         | GU572319         | GU572280     |
| <i>L. violacea</i> (L.) Pers.                                 | Japan; B.H. Choi 9824<br>(IUI)                    | GU572202 |                  |                  |                  |              |
|                                                               | Japan; B.H. Choi 9828<br>(IUI)                    |          | GU572361         | GU572242         | GU572321         | GU572282     |
| <i>L. virgata</i> (Thunb.)<br>DC.                             | Korea; J.E. Han 53<br>(IUI)                       | GU572203 | GU572362         | GU572243         | GU572322         | GU572283     |
| <i>L. virginica</i> (L.)<br>Britton                           | USA; T. Nemoto & J.<br>Yokoyama 95817018          | GU572201 | GU572360         | GU572241         | GU572320         | GU572281     |
| <i>Campylotropis</i><br><i>macrocarpa</i> (Bunge)<br>Rehder   | Japan; B.H. Choi 9808<br>(IUI)                    | GU572164 | GU572323         | GU572204         | GU572284         | GU572244     |
| <i>Kummerowia</i><br><i>stipulacea</i> (Maxim.)<br>Makino     | Korea; B.H. Choi <i>et al.</i><br>9826 (IUI)      | GU572167 | GU572326         | GU572207         | GU572287         | GU572247     |
| <i>K. striata</i> (Thunb.)<br>Schindl.                        | Korea; B.H. Choi <i>et al.</i><br>9827 (IUI)      | GU572168 | GU572327         | GU572208         | GU572288         | GU572248     |
| <i>Hyloidesmum oldhamii</i><br>(Oliv.) H.Ohashi &<br>R.R.Mill | Korea; B.H. Choi 9809<br>(IUI)                    | GU572165 | GU572324         | GU572205         | GU572285         | GU572245     |
| <i>H. podocarpum</i> (DC.)<br>H.Ohashi &<br>R.R.Mill          | Korea; B.H. Choi 9810<br>(IUI)                    | GU572166 | GU572325         | GU572206         | GU572286         | GU572246     |

loid legumes (Stefanović *et al.*, 2009). Voucher specimens of the samples collected were deposited in herbaria at Inha University (IUI) and Tohoku University (TUS).

#### MOLECULAR TECHNIQUES

Total DNA was extracted from either silica gel-dried leaves or dry leaves from herbarium samples, using a

modified cetyl trimethylammonium bromide (CTAB) procedure (Doyle & Doyle, 1987) and a G-spin IIP for Plant Genomic DNA Extraction Kit (Intron Bio Co., Korea). The internal transcribed spacer (ITS) of nuclear ribosomal DNA and plastid sequences have been widely applied for phylogenetic studies to resolve relationships between closely related genera in Fabaceae (Wojciechowski, Lavin & Sanderson, 2004; Ribeiro *et al.*, 2007; Saslis-Lagoudakis *et al.*,



**Table 3.** Sequences of primers used for PCR amplification and sequencing of nuclear ribosomal internal transcribed spacer (ITS) and four plastid regions

| Region           | Primer | Sequence (5'–3')                         |
|------------------|--------|------------------------------------------|
| ITS              | ITS4   | TCCTCCGCTTATTGATATGC                     |
|                  | ITS5   | GGAAGTAAAAGTCGTAACAAGG                   |
| <i>trnK-matK</i> | matK6  | TGGGTTGCTAACTCAATGG                      |
|                  | matKAR | CTGTTGATACATTCTGA                        |
| <i>psbK-psbI</i> | psbK   | GTTTTCCCAGTCACGACTTAGCCTTTGTTTGGCAAG     |
|                  | psbI   | CAGGAAACAGCTATGACAGAGTTTGAGAGTAAGCAT     |
| <i>trnH-psbA</i> | trnH   | GTTTTCCCAGTCACGACCGCATGGTGGATTACAAATCC   |
|                  | psbA   | CAGGAAACAGCTATGACGTTATGCATGAACGTAATGCTC  |
| <i>rpoC1</i>     | rpoC1F | GTTTTCCCAGTCACGACGTGGATACACTTCTTGATAATGG |
|                  | rpoC1R | CAGGAAACAGCTATGACCCATAAGCATATCTTGAGTTGG  |

2008; Stefanović *et al.*, 2009). Moreover, combined analyses of ITS and plastid sequences have been conducted to address phylogeographic and phylogenetic questions relating to other plant taxa that show disjunct distributions between east Asia and North America (Xiang *et al.*, 1998; Nie *et al.*, 2006; Jiao & Li, 2007; Havill *et al.*, 2008). Here, we analysed the nuclear ribosomal ITS and four plastid regions (*trnH-psbA*, *trnK-matK*, *psbK-psbI* and *rpoC1*), because these have been used successfully for phylogenetic studies of closely related plants (Shaw *et al.*, 2005) and/or plant DNA barcoding studies (Kress *et al.*, 2005; Ford *et al.*, 2009; Clerc-Blain *et al.*, 2010). We conducted PCR amplifications of the complete ITS regions and plastid regions from template DNA following the protocols of Choi & Kim (1997) and Miller & Bayer (2001), respectively. Primer sequences for each region are presented in Table 3.

Sequences from both strands were obtained under BigDye<sup>TM</sup> terminator cycling conditions. The products were purified via ethanol precipitation and run on an Automatic Sequencer (Model 3730xl; Applied Biosystems, USA). Sequences were aligned by CLUSTAL X (1.81) and were visually adjusted to resolve minor conflicts.

#### PHYLOGENETIC ANALYSES

Sequence data were analysed by maximum parsimony (MP) and Bayesian approaches. These analyses were performed separately for the nuclear ITS and four plastid regions and the two DNA sequences were also concatenated in a combined analysis. Congruence between the combined DNA data sets was assessed by an incongruence length difference (ILD) test (Farris *et al.*, 1994). We implemented the partition homogeneity test in PAUP\* 4.0b10 (Swofford, 2003) with an heuristic search and random addition sequences. MP analyses were performed in PAUP\* 4.0b10. Heuristic

searches were conducted with 1000 random addition replicates and the tree-bisection-reconnection (TBR) branch-swapping algorithm, holding 10 trees at each step with MulTrees on. All characters were equally weighted and gaps were treated as missing data. Bootstrap analyses were performed with 1000 replicates to estimate the support values for clades. Bayesian analyses were performed with MrBayes 3.1.1 (Huelsenbeck & Ronquist, 2001). We ran four simultaneous Monte Carlo Markov Chain searches for 3 million generations. The chains were sampled every 1000 iterations. Burn-in time was estimated from the plot of likelihoods generated using the 'sump' command in MrBayes. Posterior probabilities were based on analysis of post-burn-in trees. The best-fit models were determined using the Akaike information criterion (AIC) as implemented by MrModeltest 2.3 (Nylander, 2004). The model HKY + G was selected for ITS and GTR + I + G was used for plastid and combined sequence data.

#### RESULTS

Sequence characteristics of ITS, plastid and combined DNA data sets are shown in Table 4. For our complete ITS region analysis, sequence alignment required 28 indels. One of the 282 most parsimonious trees from MP analysis is shown in Figure 1, with bootstrap percentages and Bayesian posterior probabilities (PP). The Bayesian tree topology (tree not shown) was similar to that from MP (Fig. 1).

MP and Bayesian trees show that *Campylotropis* is sister to *Lespedeza* plus *Kummerowia*, with strong support (97% bootstrap, 100% PP). The MP tree weakly supports monophyly of *Lespedeza* (60% bootstrap), which is sister to *Kummerowia*. The latter forms a polytomy, together with the subgeneric groups of genus *Lespedeza* in the Bayesian analysis.

**Table 4.** Values and statistics from parsimony analyses of internal transcribed spacer (ITS), plastid and combined DNA data

|                                                         | Nuclear    | Plastid   | Combined  |
|---------------------------------------------------------|------------|-----------|-----------|
| Unaligned length of sequences (bp)                      | 643–660    | 2202–2334 | 2851–3013 |
| Aligned length of sequences (bp)                        | 685        | 2517      | 3201      |
| No. of variable characters                              | 220        | 307       | 523       |
| No. of potentially parsimony informative characters (%) | 153 (22.3) | 154 (6.1) | 294 (9.2) |
| No. of trees retained                                   | 282        | > 10 000  | 565       |
| Tree length                                             | 391        | 391       | 799       |
| Consistency index (CI)                                  | 0.70       | 0.87      | 0.77      |
| Retention index (RI)                                    | 0.86       | 0.89      | 0.85      |

In genus *Lespedeza*, subgenus *Macrolespedeza* is monophyletic (100% bootstrap, 100% PP) in MP and Bayesian analyses, but subgenus *Lespedeza* is paraphyletic. Among members of subgenus *Lespedeza*, the North American species form a monophyletic group (90% bootstrap, 100% PP), whereas the eastern Asian species are paraphyletic with respect to *Macrolespedeza*. The North American clade can be divided into two monophyletic groups, with strong support. Among the Asian subgenus *Lespedeza*, four species (*L. chinensis* G. Don, *L. floribunda* Bunge, *L. tomentosa* and *L. virgata* (Thunb.) DC.) are sister to subgenus *Macrolespedeza* (Fig. 1). All species of Asian *Lespedeza*, including subgenera *Lespedeza* and *Macrolespedeza*, form a monophyletic clade with weak support (50% bootstrap, 57% PP); this clade is sister to North American species of subgenus *Lespedeza* in both trees.

The sequence matrix for the four combined plastid regions was 2517 bp long. Each region contributed to that length as follows: *trnK-matK*, 896 characters (867–880 bp); *psbK-psbI*, 556 characters (449–551 bp); *trnH-psbA*, 387 characters (276–382 bp); and *rpoC1*, 574 characters (574 bp). All regions had different levels of potentially informative characters, with *trnH-psbA* being the most informative (10.7%), followed by *psbK-psbI* (7.2%), *trnK-matK* (5.9%) and *rpoC1* (1.9%). The number of indel events scored was 10 from *psbK-psbI*, 21 from *trnH-psbA* and 22 from *trnK-matK*. No events were noted for the *rpoC1* region. One of most parsimonious trees from MP analysis with bootstrap percentages is shown in Figure 2. Topology of the parsimony tree was almost identical to that for the Bayesian (tree not shown).

Based on plastid DNA data, the MP and Bayesian trees revealed that genus *Campylotropis* is sister to *Lespedeza* plus *Kummerowia* (67% bootstrap, 100% PP). However, the relationships between *Kummerowia* and *Lespedeza* were not resolved in the MP strict consensus and Bayesian trees. According to our plastid sequence data, the subgeneric relationships of genus *Lespedeza* are highly congruent with those noted in the

ITS analyses. The plastid DNA tree strongly supports monophyly of subgenus *Macrolespedeza* (92% bootstrap, 100% PP), but species within subgenus *Lespedeza* form a paraphyletic group in both trees. North American species of subgenus *Lespedeza* form a clade (68% bootstrap, 100% PP), which is then further divided into two monophyletic groups that are the same as those of the ITS trees. In contrast, the Asian species of subgenus *Lespedeza* are sister to the Asian subgenus *Macrolespedeza* and not to the North American species of subgenus *Lespedeza*. Among those Asian species from subgenus *Lespedeza*, three species (*L. chinensis*, *L. floribunda* and *L. virgata*) are sister to the other species and *Lespedeza pilosa* (Thunb.) Siebold & Zucc. is also separated from the other Asian species (Fig. 2). Monophyly of all Asian species from genus *Lespedeza* is supported by parsimony (91% bootstrap) and Bayesian trees (99% PP).

The combined matrices of the nuclear ribosomal and plastid DNA sequences were 3201 bp long, of which 294 bp (9.2%) were potentially parsimony informative characters. Analysis produced 565 equally most parsimonious trees with a score of 799, with consistency index = 0.77 and retention index = 0.85. One of the most parsimonious trees, with bootstrap percentages, is shown in Figure 3. For the Bayesian analysis, we used the same matrix as for MP. The Bayesian tree topology (tree not shown) was similar to the parsimony one (Fig. 3). Bayesian posterior probabilities are also shown in Figure 3.

Our ILD test indicated that the two partitions (nuclear ITS and plastid DNA) are significantly incongruent ( $P = 0.001$ ). The phylogenetic relationships among Asian species in each of the two subgenera show incongruence between the nuclear (Fig. 1) and plastid (Fig. 2) DNA data and no clade is common between the two MP strict consensus trees in either subgenus. The relationships among the North American species are also incongruent between the two data sets, except that the North American clade is first divided into two monophyletic groups and *Les-*

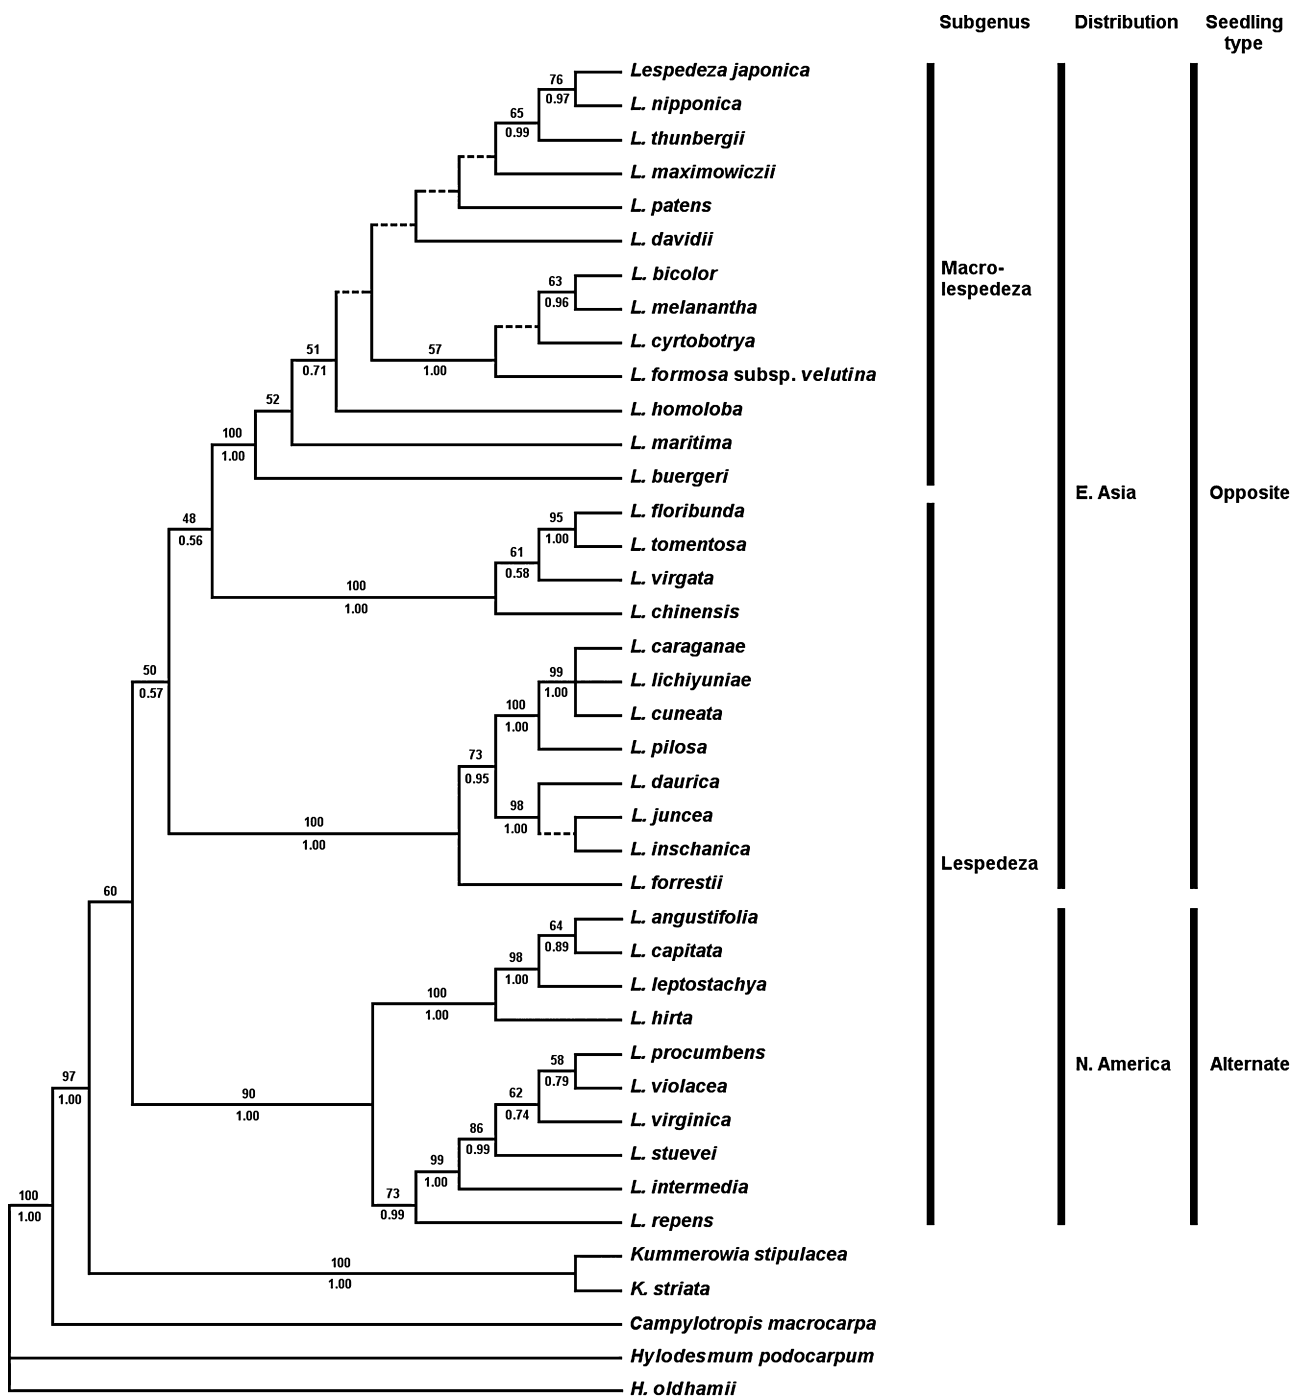

**Figure 1.** One of 282 most parsimonious trees from the parsimony analysis [1000 random addition replicates, tree-bisection-reconnection (TBR) branch swapping] of nuclear ribosomal internal transcribed spacer (ITS) 1 and 2 regions for the *Lespedeza* group. Bootstrap values are above branches and Bayesian posterior probabilities below. Dotted lines indicate branches that collapse in the strict consensus. Classification by subgenus, geographical distribution and seedling type is indicated at right.

*pedeza angustifolia* (Pursh) Elliott and *L. capitata* Michx. form a clade in both MP strict consensus trees. Nevertheless, the major tree topologies for inter- and subgeneric groups of genus *Lespedeza* are highly

congruent among nuclear ITS, plastid and combined DNA analyses (Figs 1–3).

An analysis of the combined DNA data showed that *Campylotropis* is sister to genera *Kummerowia* plus



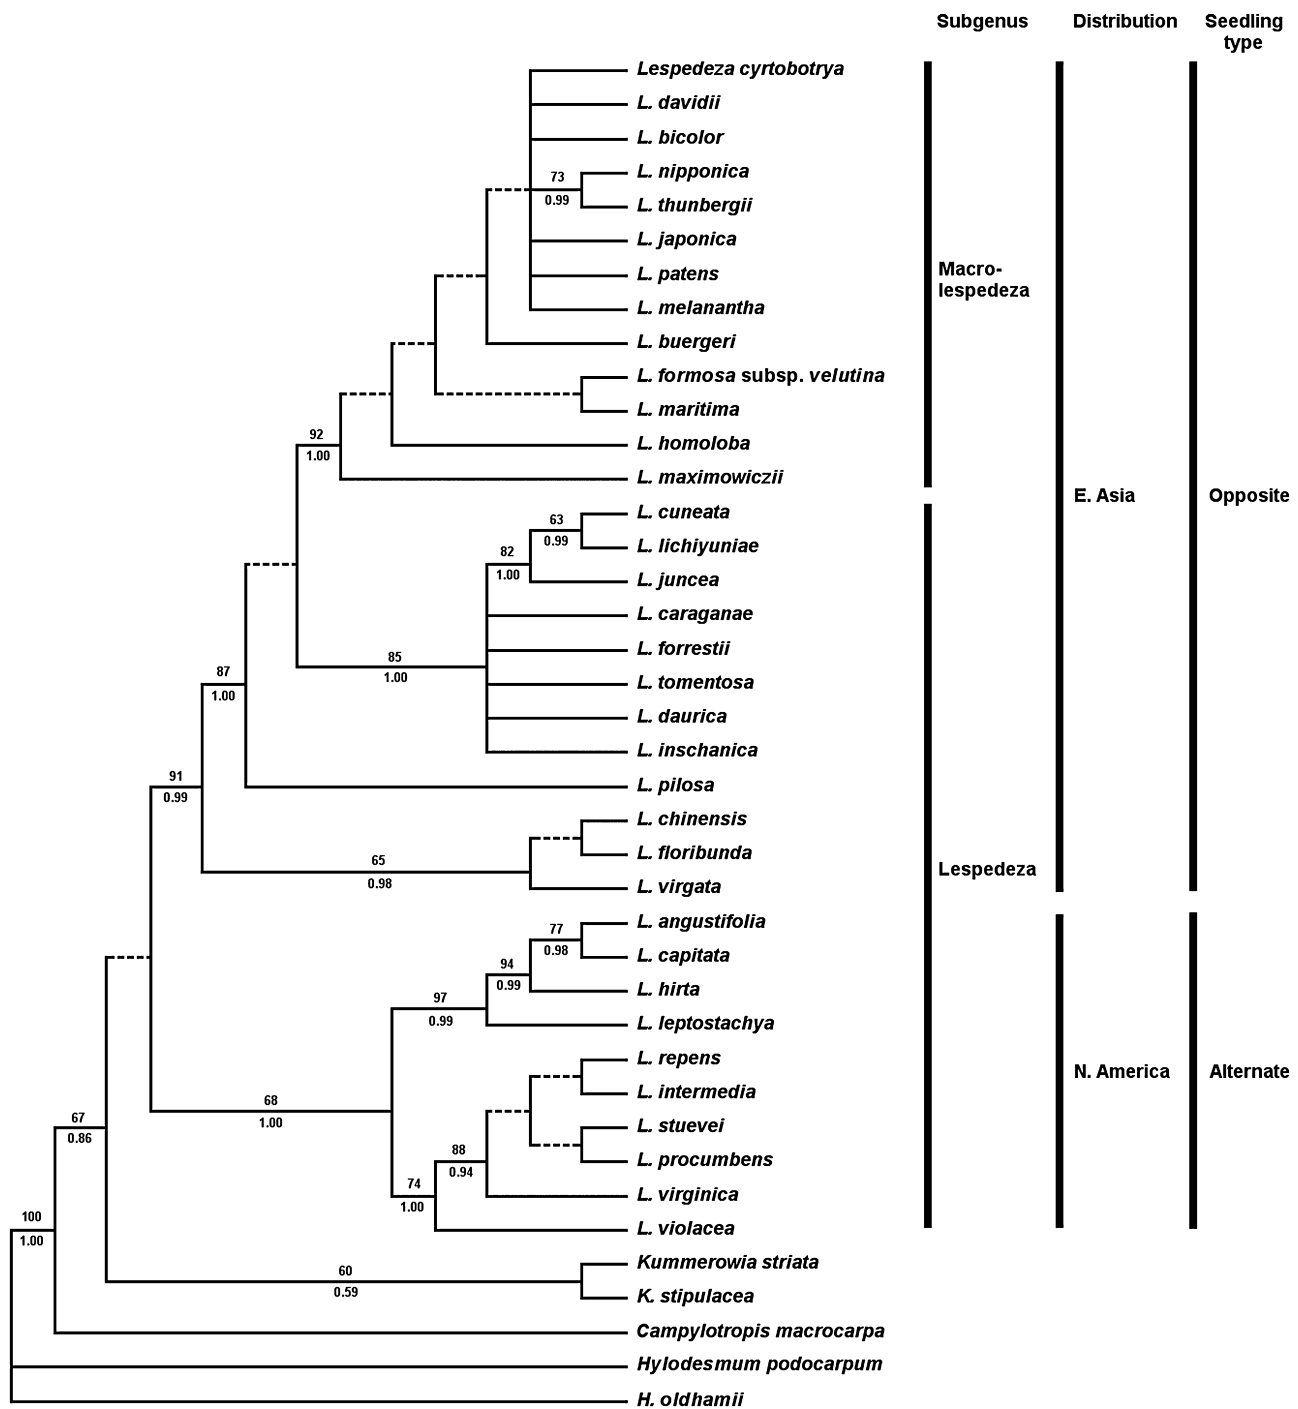

**Figure 2.** One of > 10 000 most parsimonious trees from the parsimony analysis [1000 random addition replicates, tree-bisection-reconnection (TBR) branch swapping] of four plastid regions for the *Lespedeza* group. Bootstrap values are above branches and Bayesian posterior probabilities below. Dotted lines indicate branches that collapse in the strict consensus. Classification by subgenus, geographical distribution and seedling type is indicated at right.

*Lespedeza* (100% bootstrap, 100% PP). Furthermore, *Kummerowia* is sister to a *Lespedeza* clade, with weak support (51% PP) in the Bayesian analysis and in one of the MP trees (Fig. 3). However, the *Lespedeza* clade collapses in the strict consensus tree.

The combined DNA trees strongly support monophyly of subgenus *Macrolespedeza* (100% bootstrap, 100% PP), whereas subgenus *Lespedeza* is paraphyletic. In the latter, monophyly of the North American species is strongly demonstrated in our parsimony

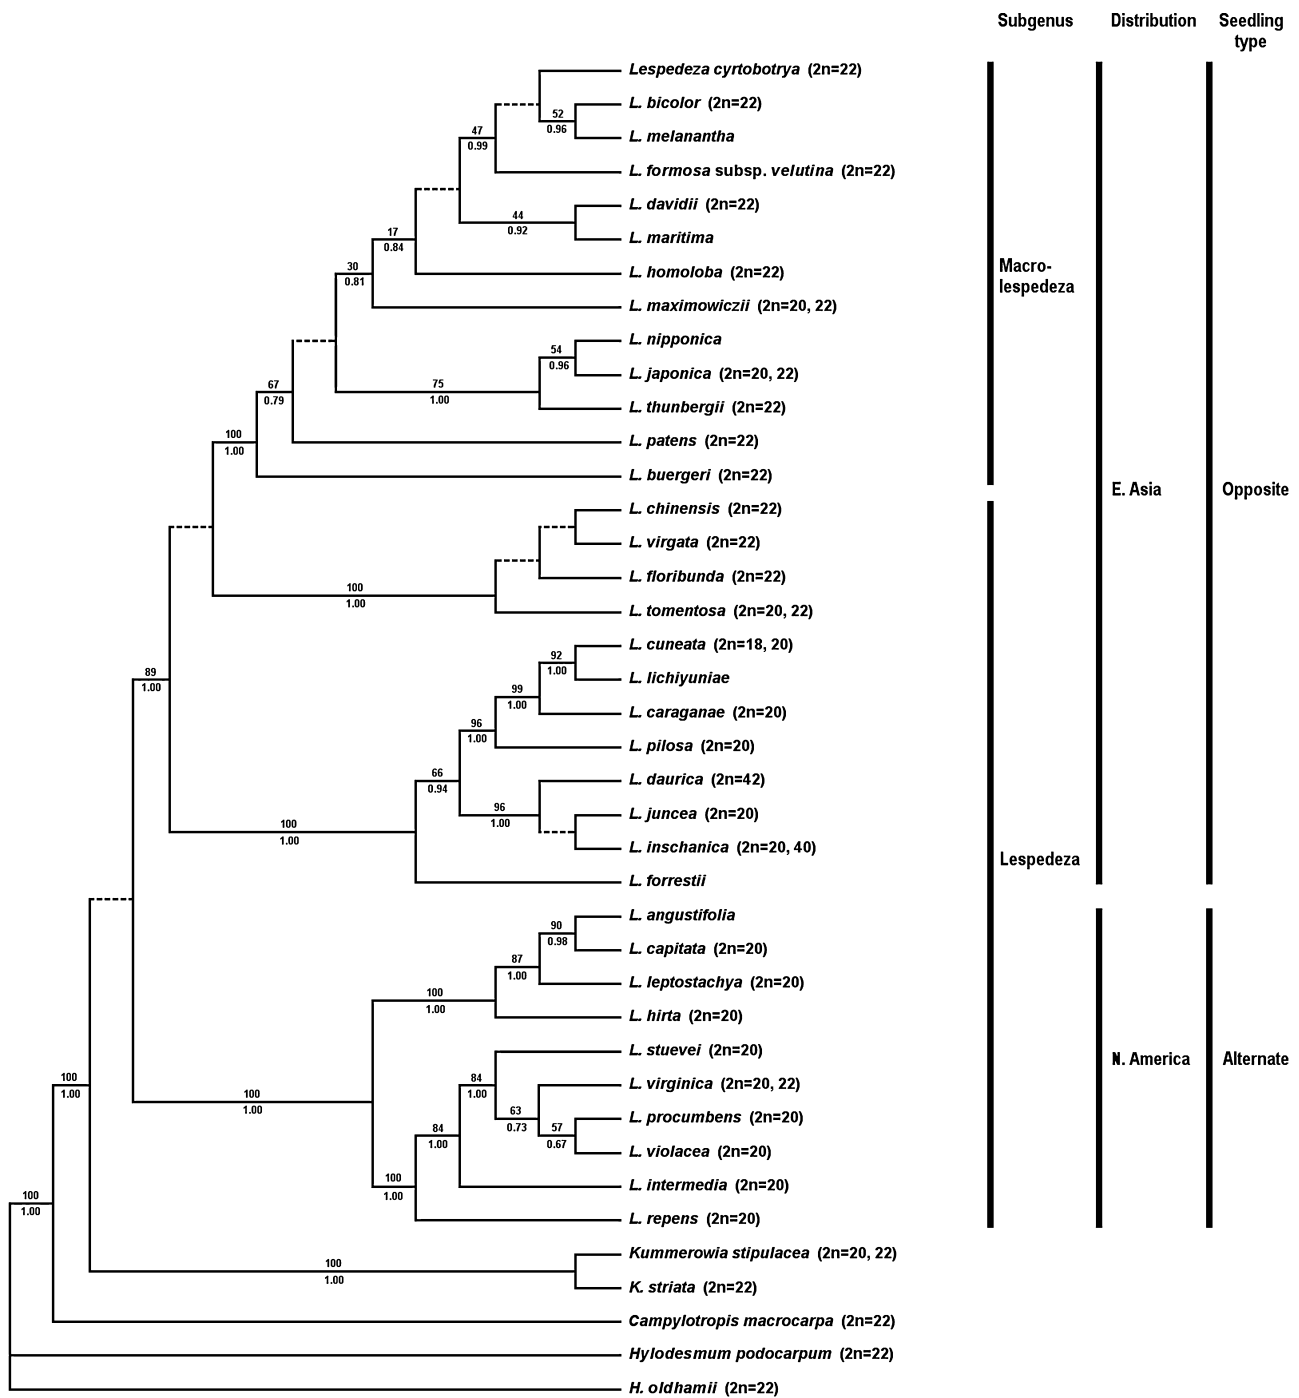

**Figure 3.** One of 565 most parsimonious trees obtained from the parsimony analysis [1000 random addition replicates, tree-bisection-reconnection (TBR) branch swapping] of the combined data from nuclear ribosomal internal transcribed spacer (ITS) and four plastid regions for the *Lespedeza* group. Bootstrap values are above branches and Bayesian posterior probabilities below. Chromosome numbers (2n) previously reported are given in parentheses. Dotted lines indicate branches that collapse in the strict consensus. Classification by subgenus, geographical distribution and seedling type is indicated at right.

and Bayesian trees (100% bootstrap, 100% PP). Two monophyletic groups have formed among North American species, with strong support, whereas Asian species are paraphyletic with respect to subgenus *Macrolespedeza*. Four species of Asian subgenus *Lespedeza* (*L. chinensis*, *L. floribunda*, *L. tomentosa* and *L. virgata*) are sister to subgenus *Macrolespedeza*, as also seen in the ITS tree. Our phylogenetic analyses of the combined DNA data revealed strong support for monophyly of all Asian *Lespedeza*, including both subgenera (89% bootstrap, 100% PP).

## DISCUSSION

### PHYLOGENETIC RELATIONSHIPS AMONG THE LESPEDEZA GROUP

*Lespedeza*, *Campylotropis* and *Kummerowia* are the sole constituents of the *Lespedeza* group (Ohashi, 2005). Strong evidence has been presented for that group being monophyletic, through analyses of *rbcL* (Kajita *et al.*, 2001) and eight plastid regions (Stefanović *et al.*, 2009). Those three genera are so similar to each other morphologically that they were once considered congeneric, either entirely or in part (Maximowicz, 1873; Taubert, 1894; Nakai, 1927; Ohashi, 1971). However, the phylogenetic relationships among *Lespedeza*, *Campylotropis* and *Kummerowia* have been debatable. A sister relationship between *Kummerowia* and *Campylotropis* is weakly supported within a large tree for legumes, based on *rbcL* sequences (Kajita *et al.*, 2001), with a single species from each genus. Stefanović *et al.* (2009) recently used three *Lespedeza* spp. and one each from *Campylotropis* and *Kummerowia* to demonstrate a monophyletic relationship between *Lespedeza* and *Kummerowia* using *trnL-F* sequences of 'phaseoloid legumes'. In our analyses with almost all species of *Lespedeza* and *Kummerowia* and one of *Campylotropis*, our results show that *Campylotropis* is sister to the other two genera, with strong support gained from all phylogenetic trees. Nevertheless, the ITS Bayesian tree and strict consensus trees of plastid and combined data do not resolve the relationship between *Kummerowia* and *Lespedeza*, reported for trees obtained from an analysis of *trnL-trnF* data (Nemoto *et al.*, 2010). This suggests a closer relationship of *Lespedeza* to *Kummerowia* than to *Campylotropis*. Such a conclusion is consistent with the historical taxonomic treatment of these groups as congeneric (see Isely, 1948; Ohashi, 1982b) and morphological and RFLP analyses of plastid DNA (Nemoto & Ohashi, 1990, 1993a, 1996; Nemoto *et al.*, 1995). By contrast, we were able to resolve *Kummerowia* as sister to the *Lespedeza* clade in a MP strict consensus tree of ITS and in each one of most parsimonious trees from our

plastid and combined DNA data. Thus, *Lespedeza* appears to be more closely related to *Kummerowia* than to *Campylotropis*. Nonetheless, the phylogenetic trees are still incongruent with these morphological distinctions and current taxonomic treatments.

### PHYLOGENETIC RELATIONSHIPS AMONG THE INFRAGENERIC GROUPS OF *LESPEDEZA*

Maximowicz (1873) previously divided the genus *Lespedeza* into two groups, sections *Macrolespedeza* and *Lespedeza* (as *Eulespedeza*). This treatment was then adopted by Taubert (1894), Schindler (1913), Nakai (1927) and Akiyama (1988). It was further divided into subgenera by Ohashi (1982a) and Ohashi, Nemoto & Ohashi (2009a, b). Subgenus *Macrolespedeza* is restricted to eastern Asia, whereas subgenus *Lespedeza* shows a disjunct distribution between eastern Asia and eastern North America.

All of the phylogenetic trees based on ITS and plastid sequence data strongly demonstrate the monophyly of subgenus *Macrolespedeza*, but subgenus *Lespedeza* is paraphyletic in all trees. For the latter, North American species are strongly supported as monophyletic in all analyses, but the Asian taxa are paraphyletic. All trees provide strong evidence for a monophyletic origin of eastern Asian *Lespedeza* comprising two subgenera. The main clades obtained by our analyses of nuclear and plastid sequence data are highly congruent with those obtained from plastid DNA (*trnL-trnF*) analysis (Nemoto *et al.*, 2010).

Moreover, the division of *Lespedeza* into Asian and North American clades is closely related to differences in seedling types between those continents (Nemoto & Ohashi, 1993b), whereas it is inconsistent with the subgeneric classification in genus *Lespedeza*. Although our results more strongly support subgenus *Macrolespedeza* than those from *trnL-trnF* data (Nemoto *et al.*, 2010), the phylogenetic relationships among the three species groups, which Akiyama (1988) proposed as series within section *Macrolespedeza*, remain unresolved in all analyses presented here.

### PHYLOGENETIC RELATIONSHIPS AMONG SPECIES OF *LESPEDEZA*

Our study covered two main groups in the genus *Lespedeza* (eastern Asian and eastern North American species). The phylogenetic relationships among Asian species in each of the two subgenera show significant incongruence between the nuclear and plastid DNA data, perhaps a result of hybridization between species (Ferguson & Jansen, 2002; Kim & Donoghue, 2008). The phenomenon of natural hybrids has been reported previously in *Lespedeza* (Lee, 1965; Akiyama & Ohba, 1982; Akiyama, 2003). Within the

Asian clade, the group comprising *L. chinensis*, *L. floribunda*, *L. virgata* and *L. tomentosa* (belonging to subgenus *Lespedeza*) is sister to subgenus *Macrolespedeza*, based on ITS and combined DNA trees. However, those first three species are sister to all other Asian species only in the plastid DNA tree, and their monophyly is also demonstrated in the plastid DNA (*trnL-trnF*) tree presented by Nemoto *et al.* (2010). A hybrid has already been described between *L. tomentosa* and *L. virgata* (Lee, 1965; Ohashi *et al.*, 2009a). Without evidence, Schindler (1913) located *L. chinensis*, *L. floribunda* and *L. virgata* in an early branching position in the Asian lineage, as shown in his phylogenetic diagram of subgenus *Lespedeza* (as section *Lespedeza*). Our current findings are partly consistent with Schindler's determination.

Two sets of chromosome numbers ( $2n = 22$ , or  $n = 11$ ; and  $2n = 20$ , or  $n = 10$ ) and a few polyploids or aneuploids, have been reported for *Lespedeza* (Nishikawa, 2008; Index to Plant Chromosome Numbers Database accessed on 8 January 2010; other references summarized by Nemoto *et al.*, 2010). The chromosome numbers  $2n = 20$  or  $n = 10$  are common throughout subgenus *Lespedeza*, except for *L. chinensis*, *L. floribunda* and *L. virgata* ( $2n = 22$  or  $n = 11$ ). Numbers based on  $n = 11$  have also been found in subgenus *Macrolespedeza*, and  $2n = 22$  ( $n = 11$ ) is common in *Kummerowia* and *Campylotropis* and in other genera attributed to subtribe Desmodiinae Benth. & Hook.f. of tribe Desmodieae and the allied tribe Phaseoleae DC. (Goldblatt, 1981). Therefore, it can be regarded as plesiomorphic, whereas  $2n = 20$  ( $n = 10$ ) is apomorphic in *Lespedeza* (Nemoto *et al.*, 2010). These chromosomal data are consistent with the closer positioning of *L. chinensis*, *L. floribunda* and *L. virgata* to subgenus *Macrolespedeza* and the early branching position of the Asian *Lespedeza* clade.

In the Asian clade, *Lespedeza lichiyuniae* T.Nemoto, H.Ohahi & T.Itoh is closely related to *L. cuneata* (Dumon de Courset) G.Don in all trees. Nemoto, Ohashi & Itoh (2007), however, assumed the closer relationships of *L. lichiyuniae* to *L. juncea* and *L. cuneata* based on morphological observations. The plastid DNA trees agree with their assumption better than do the ITS trees. Series *Pilosa* of Maximowicz (1873) is monotypic (only *L. pilosa*) and is separated from the other series in subgenus *Lespedeza* in the plastid DNA tree.

In all analyses of North American species, two main clades have been identified similar to those based on plastid (*trnL-trnF*) data (Nemoto *et al.*, 2010). They are consistent with sections *Lespedeza* (as *Eulespedeza*) and *Lespedezaria* (Torrey & Gray, 1840) or with the series *Violaceae* and *Lespedezariae* (Maximowicz, 1873). Schindler (1913) also recognized these two groups as independent lineages in his phylogenetic

diagram. According to Torrey & Gray (1840) and the keys for identification shown by Isely (1955) and Clewell (1966), these two clades of North American species clearly correspond to diversifications in flower colour, relative length of calyx to pod and inflorescence features. However, the topology of each clade differs between the ITS and plastid DNA trees.

#### BIOGEOGRAPHICAL IMPLICATIONS FOR THE DISJUNCT DISTRIBUTION OF *LESPEDEZA*

*Kummerowia* and *Campylotropis* of the *Lespedeza* group are restricted to Asia. All 11 genera in the Phyllodium group and 14 of 16 genera in the Desmodium group (both tribe Desmodieae) are distributed mostly in Asia, with a few also occurring in Africa and Australia, including New Caledonia (Ohashi, 2005). For the genus *Lespedeza*, all species of subgenus *Macrolespedeza* and many of subgenus *Lespedeza* are naturally distributed in eastern Asia (Ohashi *et al.*, 2009a, b), whereas the rest of subgenus *Lespedeza* (c. 11 species) are found only in eastern North America (Clewell, 1966). This bias toward Asia in the allied genera sister to *Lespedeza* suggests that the ancestral area is in Asia.

Phylogenetic analyses using nuclear ribosomal and plastid sequence data revealed two highly distinct clades corresponding to Asia and North America in *Lespedeza*. Furthermore, no sister-species relationships were formed between eastern Asian and North American species in subgenus *Lespedeza*, consistent with the disjunct pattern shown for most genera of flowering plants (Wen, 1999, 2001). This suggests that ancestral species on both continents diversified early in the origin of the genus and that independent speciation occurred afterwards, either through restricted interchange of species between the regions or with extinction of such interchanging species. More than twice as many species of *Lespedeza* are found in eastern Asia than in North America and an ancestral lineage of subgenus *Macrolespedeza* has diverged from the Asian lineage. This greater species diversity in eastern Asia is common within disjunct genera between the two regions (Wen, 1999; Xiang *et al.*, 2004).

Based on plastid sequence data, the estimated time of divergence for the *Lespedeza* group from the Desmodium group is 10.8–16.5 Myr, whereas that of three lineages corresponding to east Asian *Lespedeza*, North American *Lespedeza* and the genus *Kummerowia* is approximately 2.4–4.3 Myr (Stefanović *et al.*, 2009). The Bering land bridge was considered suitable for exchanges of temperate deciduous plants during the Miocene (Tiffney, 1985) and remained available for floristic exchange until the later Tertiary (Tiffney & Manchester, 2001) or approximately



3.5 Myr (Wen, 1999). Based on those estimates, intercontinental migration between eastern Asia and eastern North America appears to have occurred via the Bering land bridge around the time of its closing.

# ACKNOWLEDGEMENTS

Mr Kook-Hyun Chung, the second author of this study, passed away during the preparation of this manuscript after a long battle with cancer. He worked with ITS sequences on this study during the course of his Master's degree at Inha University and moved to UC Davis to pursue a PhD. Kook-Hyun loved taxonomy and studying plants and is sorely missed. We would like to thank Prof. Y. Tateishi (Ryukyuu University) and Drs Y. Endo (Ibaraki University), T. Kajita (Chiba University), J. H. Kim (Kyungwon University) and C. Y. Yoon (Shingyeong University) for their support during the fieldwork. Nemoto is grateful to Profs T.-C. Huang and C.-F. Hsieh (National Taiwan University) for their support of our fieldwork in Taiwan; Profs S.-G. Wu (Kunming Institute of Botany), J. Murata (The University of Tokyo) and Ms H. Murata (Setsunan University) for their kind cooperation in collecting materials in China; Dr D. E. Boufford and Ms E. W. Wood (Harvard University Herbaria); Ms D. Lewis (Ada Hayden Herbarium, Iowa State University); and Prof. J. Yokoyama (Yamagata University) for their cooperation in the USA. We sincerely thank Emeritus Prof. H. Ohashi (Tohoku University) for his continued guidance during this study and valuable comments on the manuscript. We are also grateful to Prof. X.-Y. Zhu (Institute of Botany, CAS) for sending references, Dr Connie Champagne (UC Davis) for English editing of the manuscript and two anonymous reviewers for valuable comments. This work was supported by the Korea Research Foundation Grant funded by the Korean Government (KRF-313-2007-2-C00684 to B. H. C.).

# REFERENCES

- Akiyama S. 1988.** A revision of the genus *Lespedeza* section *Macrolespedeza* (Leguminosae). *The University Museum, The University of Tokyo, Bulletin* **33**: 1–170.
- Akiyama S. 2003.** New hybrids in *Lespedeza* section *Macrolespedeza* (Leguminosae). *Bulletin of the National Science Museum, Tokyo, Series B* **29**: 133–143.
- Akiyama S, Ohba H. 1982.** Studies on hybrids in the genus *Lespedeza* sect. *Macrolespedeza* (1) A putative hybrid between *L. buergeri* Miq. and *L. cyrtobotrya* Miq. *The Journal of Japanese Botany* **57**: 232–240.
- Akiyama S, Ohba H. 1985.** The branching of inflorescence and vegetative shoot and taxonomy of the genus *Kummerowia* (Leguminosae). *The Botanical Magazine (Tokyo)* **78**: 137–150.
- Boufford DE. 1998.** Eastern Asian–North American plant disjunctions: opportunities for further investigation. *Korean Journal of Plant Taxonomy* **28**: 49–61.
- Choi BH, Kim JH. 1997.** ITS sequences and speciation on Far Eastern *Indigofera* (Leguminosae). *Journal of Plant Research* **110**: 339–346.
- Clerc-Blain J, Starr J, Bull RD, Saarela JM. 2010.** A regional approach to plant DNA barcoding provides high species resolution of sedges (*Carex* and *Kobresia*, Cyperaceae) in the Canadian Arctic Archipelago. *Molecular Ecology Resources* **10**: 69–91.
- Clewell AF. 1966.** Native North American species of *Lespedeza* (Leguminosae). *Rhodora* **68**: 359–405.
- Doyle JJ, Doyle JL. 1987.** A rapid DNA isolation procedure for small amounts of fresh leaf tissue. *Phytochemical Bulletin* **19**: 11–15.
- Farris JS, Kallersjo M, Kluge AG, Bult C. 1994.** Testing significance if incongruence. *Cladistics* **10**: 315–319.
- Ferguson CJ, Jansen RK. 2002.** A chloroplast DNA phylogeny of eastern *Phlox* (Polemoniaceae): implications of congruence and incongruence with the ITS phylogeny. *American Journal of Botany* **89**: 1324–1335.
- Ford CS, Ayres KL, Toomey N, Haider N, van Alphen Stahl J, Kelly LJ, Wikström N, Hollingsworth PM, Duff RJ, Hoot SB, Cowan RS, Chase MW, Wilkinson MJ. 2009.** Selection of candidate coding DNA barcoding regions for use on land plants. *Botanical Journal of the Linnean Society* **159**: 1–11.
- Goldblatt P. 1981.** Cytology and the phylogeny of Leguminosae. In: Polhill RM, Raven PH, eds. *Advances in legume systematics, part 2*. Kew: Royal Botanic Gardens, 427–463.
- Havill NP, Campbell CS, Vining TF, Lepage B, Bayer RJ, Donoghue MJ. 2008.** Phylogeny and biogeography of *Tsuga* (Pinaceae) inferred from nuclear ribosomal ITS and chloroplast DNA sequence data. *Systematic Botany* **33**: 478–489.
- Huelsenbeck JP, Ronquist F. 2001.** MrBayes: Bayesian inference of phylogenetic trees. *Bioinformatics* **17**: 754–755.
- Isely D. 1948.** *Lespedeza striata* and *L. stipulacea*. *Journal of the New England Botanical Club* **50**: 590.
- Isely D. 1955.** The Leguminosae of the north-central United States II, Hedysareae. *Iowa State College Journal of Science* **30**: 33–118.
- Jiao Z, Li J. 2007.** Phylogeny of intercontinental disjunct Gelsemiaceae inferred from chloroplast and nuclear DNA sequences. *Systematic Botany* **32**: 617–627.
- Kajita T, Ohashi H, Tateishi Y, Bailey CD, Doyle JJ. 2001.** *rbcL* and legume phylogeny, with particular reference to Phaseoleae, Millettieae, and allies. *Systematic Botany* **26**: 515–536.
- Kim ST, Donoghue MJ. 2008.** Incongruence between cpDNA and nrITS trees indicates extensive hybridization within *Eupersicaria* (Polygonaceae). *American Journal of Botany* **95**: 1122–1135.
- Kress WJ, Wurdack KJ, Zimmer EA, Weigt LA, Janzen DH. 2005.** Use of DNA barcodes to identify flowering plants. *Proceedings of the National Academy of Sciences of the United States of America* **102**: 8369–8374.



- Lackey JA. 1981.** Phaseoleae. In: Polhill RM, Raven RH, eds. *Advances in legume systematics, part 1*. Kew: Royal Botanic Gardens, 301–327.
- Lee TB. 1965.** The *Lespedeza* of Korea (1). *Bulletin of the Seoul National University Forests* **2**: 1–43.
- Li H-L. 1952.** Floristic relationships between eastern Asia and eastern North America. *Transactions of American Philosophical Society* **42**: 371–429.
- Maximowicz CJ. 1873.** Synopsis generis *Lespedezae* Michaux. *Acta Horti Petropolitani* **2**: 328–388.
- Miller JT, Bayer RJ. 2001.** Molecular phylogenetics of *Acacia* (Fabaceae: Mimosoideae) based on the chloroplast *matK* coding sequence and flanking *trnK* intron spacer regions. *American Journal of Botany* **88**: 697–705.
- Nakai T. 1927.** *Lespedeza* of Japan and Korea. *The Forestal Experiment Station of Government General of Chosen* **6**: 1–101.
- Nakai T. 1939.** Notulae ad plantas Asiae orientalis IX. *The Journal of Japanese Botany* **15**: 523–541.
- Nemoto T, Ohashi H. 1988.** Floral nectaries in *Lespedeza*, *Kummerowia* and *Campylotropis*. *The Journal of Japanese Botany* **63**: 112–126.
- Nemoto T, Ohashi H. 1990.** Organographic and ontogenetic studies on the inflorescence of *Lespedeza cuneata* (Dum.-Cours.) G. Don (Leguminosae). *The Botanical Magazine* (Tokyo) **103**: 217–231.
- Nemoto T, Ohashi H. 1993a.** The inflorescence structure of *Kummerowia* (Leguminosae). *Botanical Journal of the Linnean Society* **111**: 281–294.
- Nemoto T, Ohashi H. 1993b.** Seedling morphology in *Lespedeza* (Leguminosae). *Journal of Plant Research* **106**: 121–128.
- Nemoto T, Ohashi H. 1996.** The inflorescence structure of *Campylotropis* (Leguminosae). *American Journal of Botany* **83**: 867–876.
- Nemoto T, Ohashi H, Tamate H. 1995.** Phylogeny of *Lespedeza* and its allied genera (Desmodieae–Lespedezinae). In: Crisp MD, Doyle JJ, eds. *Advances in legume systematics 7, phylogeny*. Kew: Royal Botanic Gardens, 351–358.
- Nemoto T, Ohashi H, Itoh T. 2007.** A new species of *Lespedeza* (Leguminosae) from China and Japan. *The Journal of Japanese Botany* **82**: 222–231.
- Nemoto T, Yokoyama J, Fukuda T, Iokawa Y, Ohashi H. 2010.** Phylogeny of *Lespedeza* (Leguminosae) based on chloroplast *trnL-trnF* sequences. *The Journal of Japanese Botany* **85**: 213–229.
- Nie Z-L, Sun H, Beardsley PM, Olmstead RG, Wen J. 2006.** Evolution of biogeographic disjunction between eastern Asia and eastern North America in *Phryma* (Phrymaceae). *American Journal of Botany* **93**: 1343–1356.
- Nishikawa T. 2008.** Chromosome atlas of flowering plants in Japan. *National Museum of Nature and Science Monographs* **37**. Tokyo: National Museum of Nature and Science.
- Nylander JAA. 2004.** MrModeltest version 2.3. Available at <http://www.abc.se/~nylander/>
- Ohashi H. 1971.** A taxonomic study of the tribe Coronilleae (Leguminosae) with a special reference to pollen morphology. *Journal of the Faculty of Science, University of Tokyo* Section III, Parts 1–2, **11**: 25–92.
- Ohashi H. 1982a.** Nomenclatural changes in Leguminosae of Japan. *The Journal of Japanese Botany* **57**: 29–30.
- Ohashi H. 1982b.** *Lespedeza*. In: Satake Y, Ohwi J, Kitamura S, Watari S, Tominari T, eds. *Wild flowers of Japan, herbaceous plants (including dwarf shrubs) 2*. Tokyo: Heibonsha, 204–206.
- Ohashi H. 2005.** Tribe Desmodieae. In: Lewis G, Schrire B, Mackinder B, Lock M, eds. *Legumes of the world*. Kew: Royal Botanic Gardens, 433–446.
- Ohashi H, Polhill RM, Schubert BG. 1981.** Part 1: Desmodieae. In: Polhill RM, Raven RH, eds. *Advances in legume systematics*. Kew: Royal Botanic Gardens, 292–300.
- Ohashi H, Nemoto T, Ohashi K. 2009a.** A revision of *Lespedeza* subgenus *Lespedeza* (Leguminosae) in China. *The Journal of Japanese Botany* **84**: 143–166.
- Ohashi H, Nemoto T, Ohashi K. 2009b.** A revision of *Lespedeza* subgenus *Macrolespedeza* (Leguminosae) in China. *The Journal of Japanese Botany* **84**: 197–223.
- Ribeiro RA, Lavin M, Lemos-Filho JP, Filho CVM, Santos FRD, Lovato MB. 2007.** The genus *Machaerium* (Leguminosae) is more closely related to *Aeschynomene* sect. *Ochopodium* than to *Dalbergia*: inferences from combined sequence data. *Systematic Botany* **32**: 762–771.
- Saslis-Lagoudakis C, Chase MW, Robinson DN, Russell SJ, Klitgaard BB. 2008.** Phylogenetics of neotropical *Platymiscium* (Leguminosae: Dalbergieae): systematics, divergence times, and biogeography inferred from nuclear ribosomal and plastid DNA sequence data. *American Journal of Botany* **95**: 1270–1286.
- Schindler AK. 1913.** Einige Bemerkungen über *Lespedeza* Michx. und ihre nächsten Verwandten. *Botanische Jahrbücher für Systematik, Pflanzengeschichte und Pflanzengeographie* **49**: 570–658.
- Shaw J, Lickey EB, Beck JT, Farmer SB, Liu W, Miller J, Siripun KC, Winder CT, Schilling EE, Small RL. 2005.** The tortoise and the hare II: relative utility of 21 noncoding chloroplast DNA sequences for phylogenetic analysis. *American Journal of Botany* **92**: 142–166.
- Stefanović S, Pfeil BE, Palmer JD, Doyle JJ. 2009.** Relationships among phaseoloid legumes based on sequences from eight chloroplast regions. *Systematic Botany* **34**: 115–128.
- Swofford DL. 2003.** *PAUP\*: phylogenetic analysis using parsimony (\*and other methods)*. Version 4.0b10. Sunderland, MA: Sinauer Associates.
- Taubert P. 1894.** *Lespedeza*. In: Engler A, Prantl K, eds. *Die natürlichen Pflanzenfamilien III(3)*. Leipzig: Wilhelm Engelmann, 332.
- Tiffney BH. 1985.** Perspectives on the origin of the floristic similarity between eastern Asia and eastern North America. *Journal of the Arnold Arboretum* **66**: 73–94.
- Tiffney BH, Manchester SR. 2001.** The use of geological and paleontological evidence in evaluating plant phylogeographic hypothesis in the Northern Hemisphere tertiary. *International Journal of Plant Science* **162**: 3–17.

- Torrey J, Gray A. 1840.** *Lespedeza* Michx. In: *A flora of North America* 1(3). New York: Wiley & Putnam, 366–369.
- Tucker SC. 1987.** Pseudoracemes in papilionoid legumes: their nature, development, and variation. *Botanical Journal of the Linnean Society* **95**: 181–206.
- Wen J. 1998.** Evolution of the eastern Asian and eastern North American disjunct pattern: insights from phylogenetic studies. *Korean Journal of Plant Taxonomy* **28**: 63–81.
- Wen J. 1999.** Evolution of Asian and eastern North American disjunct distributions in flowering plants. *Annual Review of Ecology and Systematics* **30**: 421–455.
- Wen J. 2001.** Evolution of eastern Asian–eastern North American biogeographic disjunctions: a few additional issues. *International Journal of Plant Sciences* **162**: S117–S122.
- Wojciechowski MF, Lavin M, Sanderson MJ. 2004.** A phylogeny of legumes (Leguminosae) based on analysis of the plastid *matK* gene resolves many well-supported subclades within the family. *American Journal of Botany* **91**: 1846–1862.
- Xiang Q-Y, Soltis DE, Soltis PS. 1998.** The eastern Asian and eastern and western North American floristic disjunction: congruent phylogenetic patterns in seven diverse genera. *Molecular Phylogenetics and Evolution* **10**: 178–190.
- Xiang Q-Y, Zhang WH, Ricklefs RE, Qian H, Chen ZD, Wen J, Li JH. 2004.** Regional differences in rates of plant speciation and molecular evolution: a comparison between eastern Asia and eastern North America. *Evolution* **58**: 2175–2184.
